# Supplementary material for: Synthetic Soil Aggregates: Bioprinted Habitats for High-Throughput Microbial Metaphenomics
Source: MDPI journal article supplement (doi:10.3390/microorganisms10050944), 2022-04-30
Supplement: s1 [file s1]

## Supplemental Materials

**Description of Image Adjustments:** In figure 4 and figure 5 of the main text, the saturation, brightness, contrast of some confocal fluorescent images was adjusted to improve visibility. These include the EC\_MOPS and EC\_NAG image. For both images in both figure 4 and figure 5 adjustment were made as follows: Brightness: +40%, Contrast: +40%, Saturation: +400%.

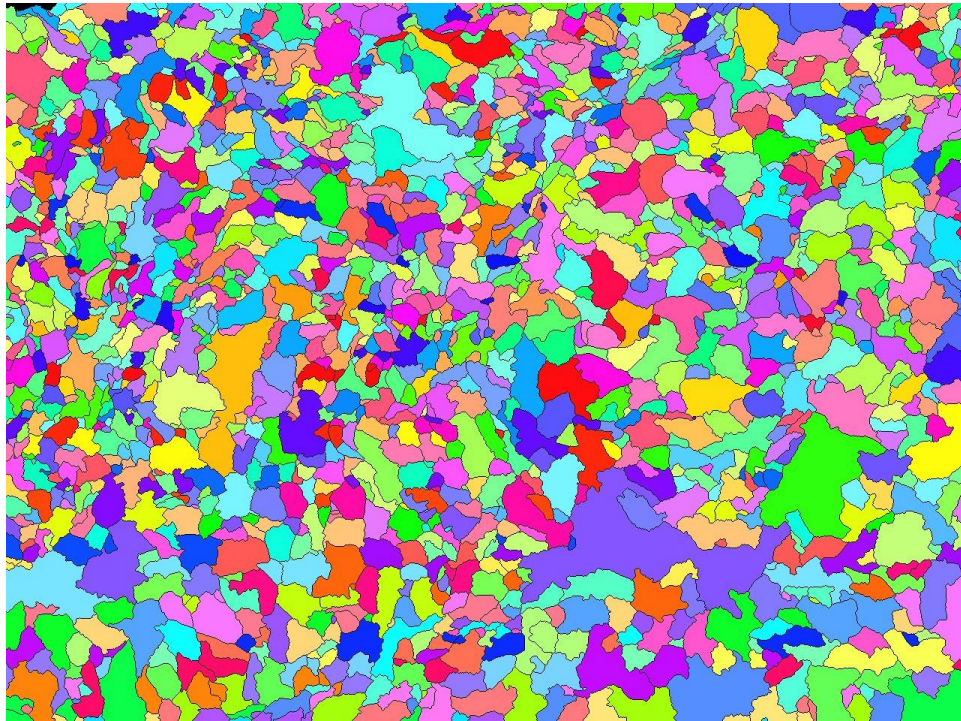

**Figure S1: MorpholibJ morphological segmentation image.**

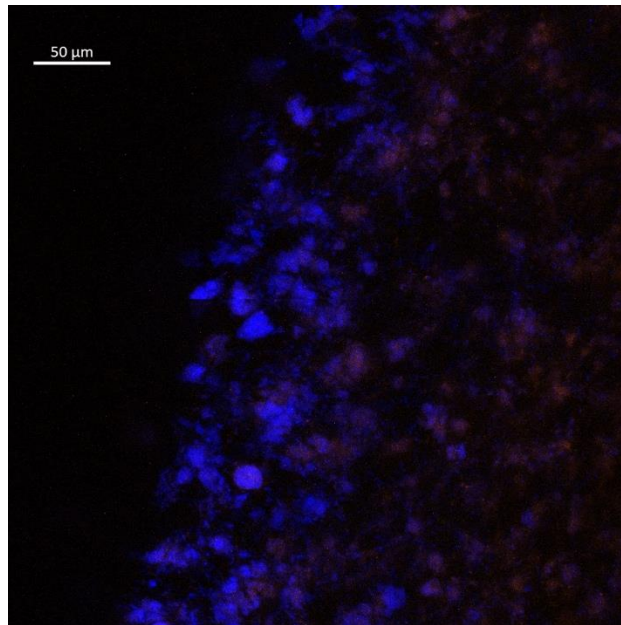

**Figure S2: Alternative color image of Figure 2D.**

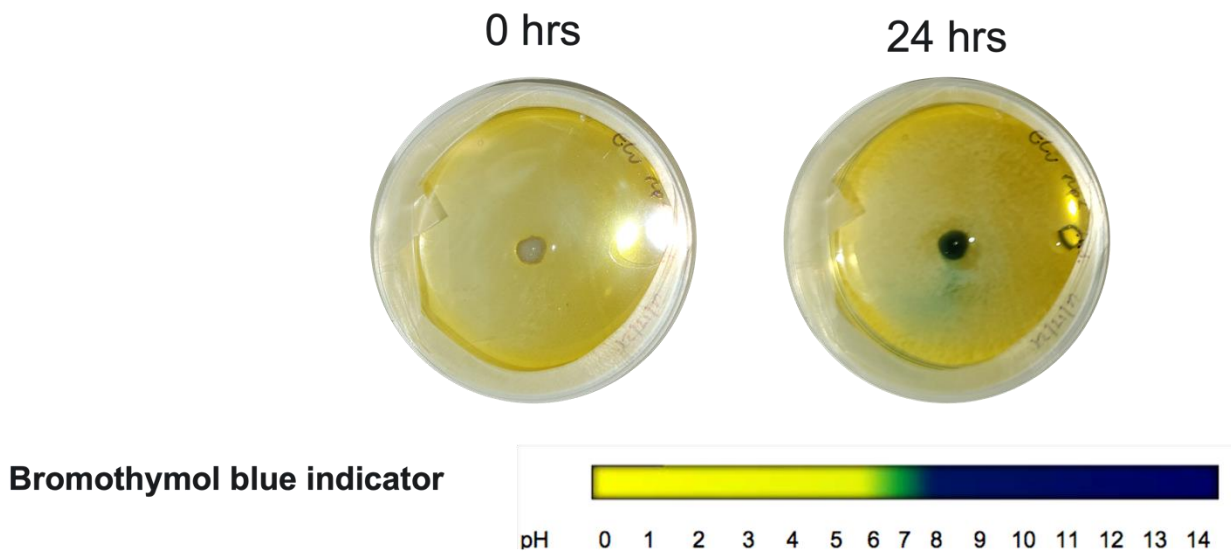

**Figure S3: Images of SSAs printed with ureolytic *E. coli* GFP.** Surrounding media contains urea, to support ureolysis, and bromothymol blue pH indicator. Images were taken 0 and 24 hours after printing. Color change is observed at 24 hours demonstrating a pH change indicative of ureolytic activity. Component of Figure 3.

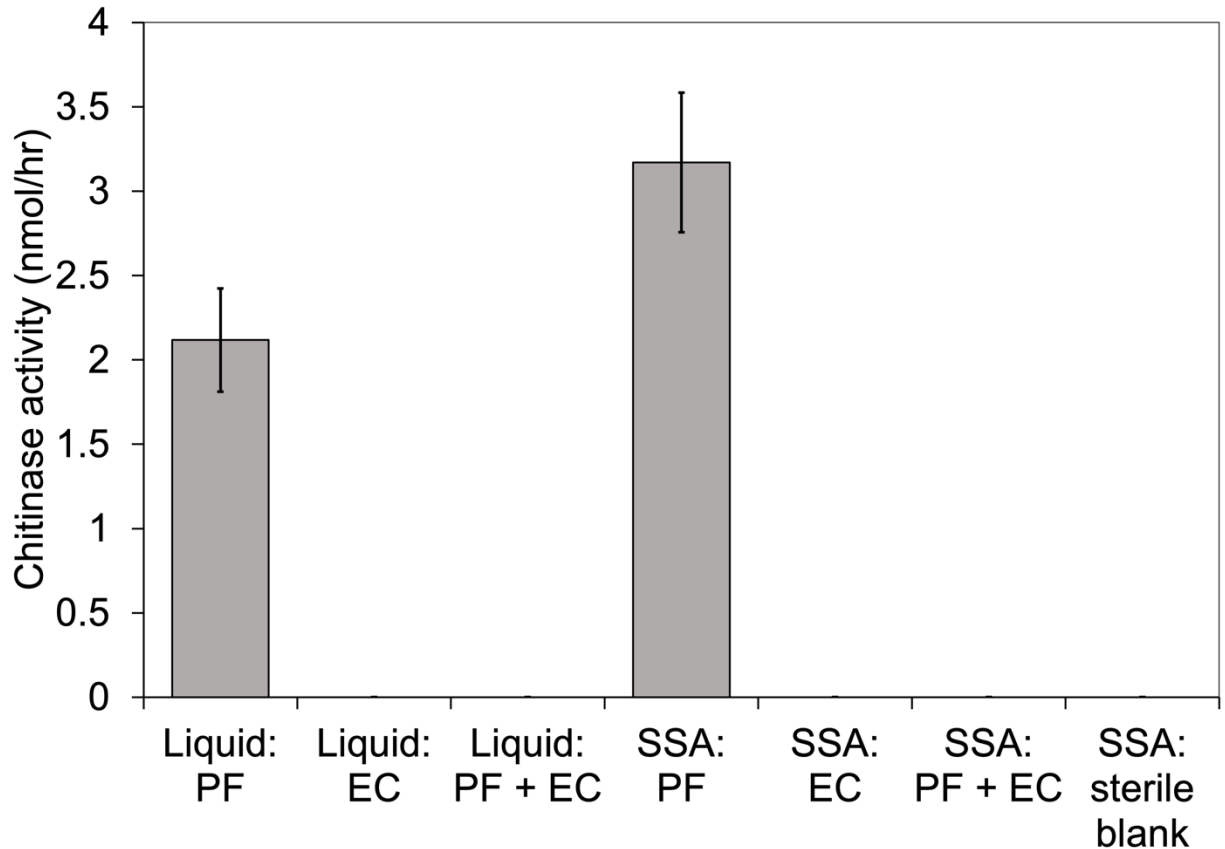

**Figure S4: Extracellular enzyme activity of chitinase** report in nmol activity hour<sup>-1</sup>. Bars represent average activity  $\pm$  standard error. Activity rates were only detectable in liquid culture of *Pseudomonas fluorescens* (PF) and in synthetic soil aggregates (SSAs) printing with PF. No chitinase activity was detected in the other treatments, including when *Escherichia coli* (EC) was present or when no bacteria were present (sterile blank). Component of Figure 3.

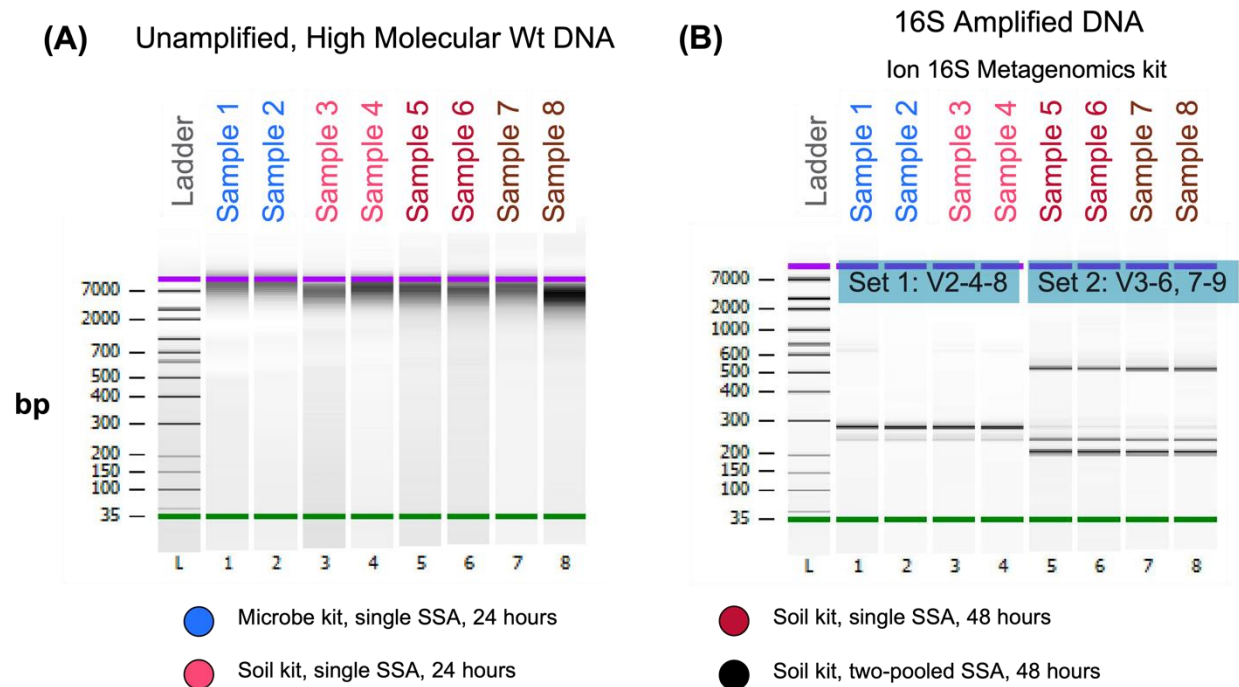

**Figure S5: Gel electrophoresis images** of (A) unamplified and (B) 16S amplified DNA extracted from single or pooled SSAs using commercial microbe or soil DNA extraction kits. Component of Figure 3.



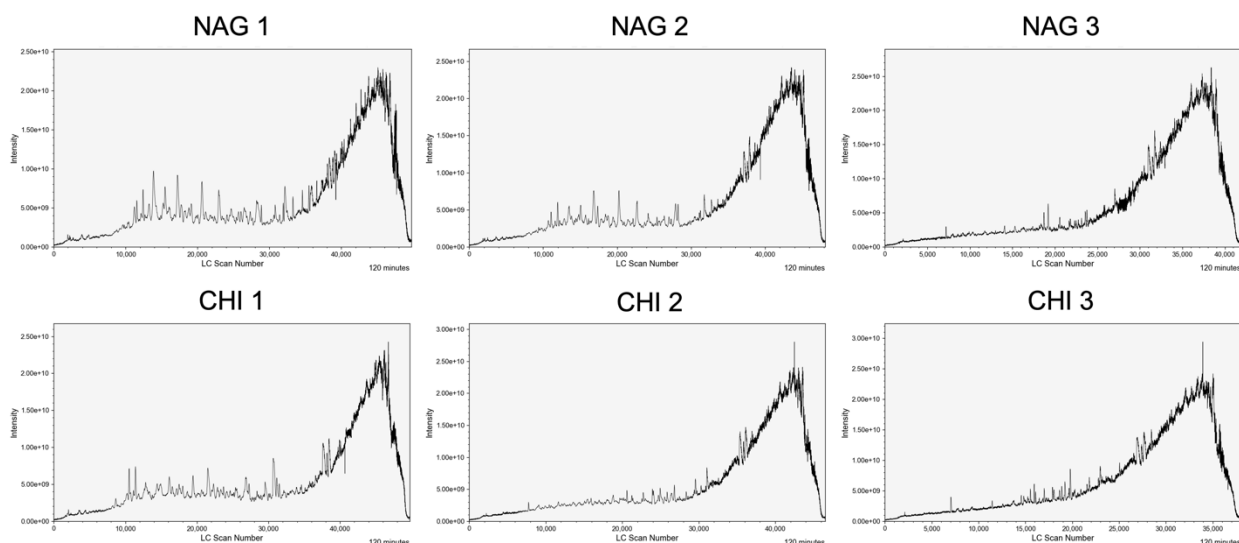

**Figure S8: Total ion chromatograms from proteomics analysis of SSAs with N-acetyl- $\beta$ -D-glucosamine (NAG) or chitin (CHI) as a growth substrate. Component of Figure 3.**

**Table S1. KS test results** comparing spatial distribution of each group based on within population distances. NA indicates no direct comparison was made.

|           | FB green              | FB red                | PF liquid             | PF NAG           | PF MOPS               | EC liquid             | EC NAG            |
|-----------|-----------------------|-----------------------|-----------------------|------------------|-----------------------|-----------------------|-------------------|
| FB red    | 0.0576                |                       |                       |                  |                       |                       |                   |
| PF liquid | 0.1848                | NA                    |                       |                  |                       |                       |                   |
| PF NAG    | <b>2.11 e -7</b>      | NA                    | <b>1.46 e -8</b>      |                  |                       |                       |                   |
| PF MOPS   | <b>&lt; 2.2 e -16</b> | NA                    | <b>&lt; 2.2 e -16</b> | <b>2.68 e -5</b> |                       |                       |                   |
| EC liquid | NA                    | 0.5253                | 0.334                 | NA               | NA                    |                       |                   |
| EC NAG    | NA                    | <b>&lt; 2.2 e -16</b> | NA                    | <b>5.96 e -7</b> | NA                    | <b>&lt; 2.2 e -16</b> |                   |
| EC MOPS   | NA                    | <b>2.87 e -14</b>     | NA                    | NA               | <b>&lt; 2.2 e -16</b> | 0.2581                | <b>1.52 e -14</b> |
